# Supplementary material for: Structural stability, dihydrogen bonding, and pressure-induced polymorphic transformations in hydrazine borane
Source: Royal Society of Chemistry journal article supplement (doi:10.1039/d3cp01301d), 2023-01-01
Supplement: d3cp01301d1.pdf [file d3cp01301d1.pdf]

SUPPORTING INFORMATION

**Structural Stability, Dihydrogen Bonding, and Pressure-Induced  
Polymorphic Transformations in Hydrazine Borane**

Rongfeng Guan,<sup>ab</sup> Pan Wang,<sup>a</sup> Yujin Ji,<sup>\*b</sup> Youyong Li,<sup>bc</sup> and Yang Song<sup>\*ac</sup>

<sup>a</sup>*Department of Chemistry, The University of western Ontario, London, Ontario, N6A 5B7, Canada*

<sup>b</sup>*Institute of Functional Nano & Soft Materials (FUNSOM), Jiangsu Key Laboratory for Carbon-Based Functional Materials and Devices, Soochow University, Suzhou 215123, Jiangsu, China*

<sup>c</sup>*Soochow University – Western University Centre for Synchrotron Radiation Research, The University of Western Ontario, London, ON N6A 5B7, Canada*

**Contents**

**Fig. S1.** Calculated XRD patterns in comparison with experimental results under ambient conditions using Rietveld refinements.

**Fig. S2.** Selected IR spectra of N<sub>2</sub>H<sub>4</sub>BH<sub>3</sub> collected at room temperature on compression in the region of 630–3400 cm<sup>-1</sup>.

**Fig. S3.** Selected Raman spectra of N<sub>2</sub>H<sub>4</sub>BH<sub>3</sub> collected at room temperature on compression in the region of 50–3400 cm<sup>-1</sup>.

**Fig S4.** The N-H...H and H...H-B angles versus pressure in phase I, phase II, and phase III.

**Table S1.** Assignments and vibrational frequencies (cm<sup>-1</sup>) of N<sub>2</sub>H<sub>4</sub>BH<sub>3</sub> at ambient pressure.

**Table S2.** The pressure dependence of characteristic IR modes of HB on compression.

**Table S3.** The pressure dependence of characteristic Raman modes of HB on compression.

**Table S4.** Refined cell parameters of N<sub>2</sub>H<sub>4</sub>BH<sub>3</sub> at presentative pressures.

**Table S5.** Crystal structures, cell parameters and Wyckoff positions for the unit cells of the Phase I, phase II and phase III of N<sub>2</sub>H<sub>4</sub>BH<sub>3</sub> optimized at ambient pressure.

**Table S6.** Crystal structures, cell parameters and Wyckoff positions for the unit cells of the top-ranked candidate structures of N<sub>2</sub>H<sub>4</sub>BH<sub>3</sub> optimized at ambient pressure.

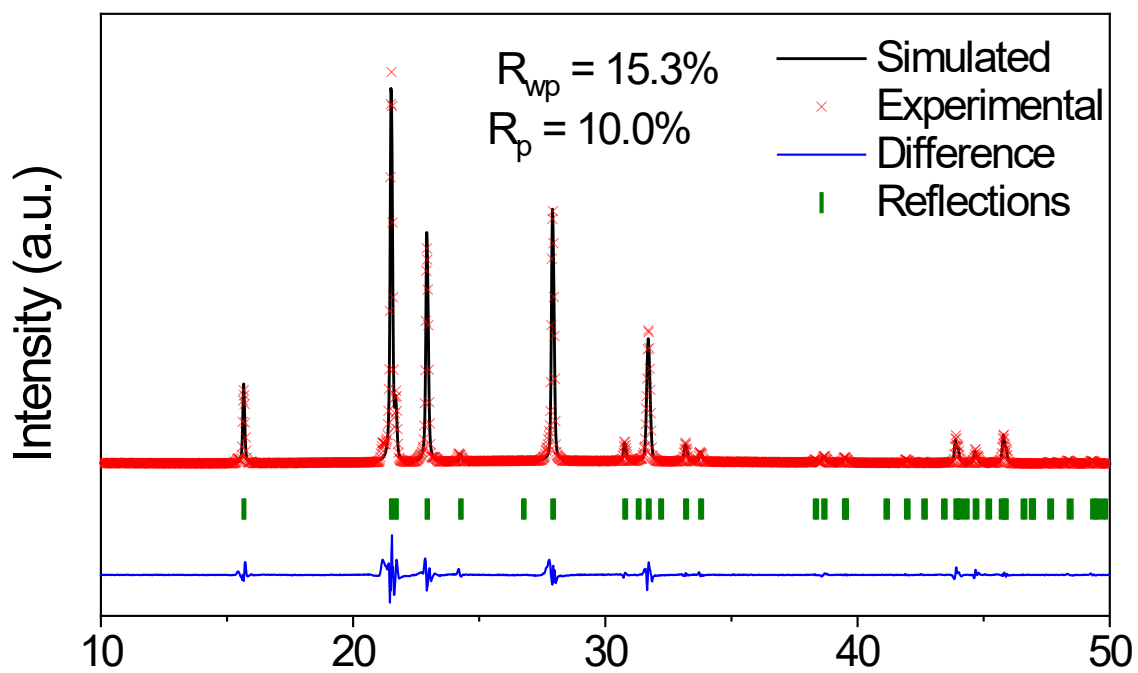

**Fig. S1.** Calculated XRD patterns in comparison with experimental results under ambient conditions using Rietveld refinements.

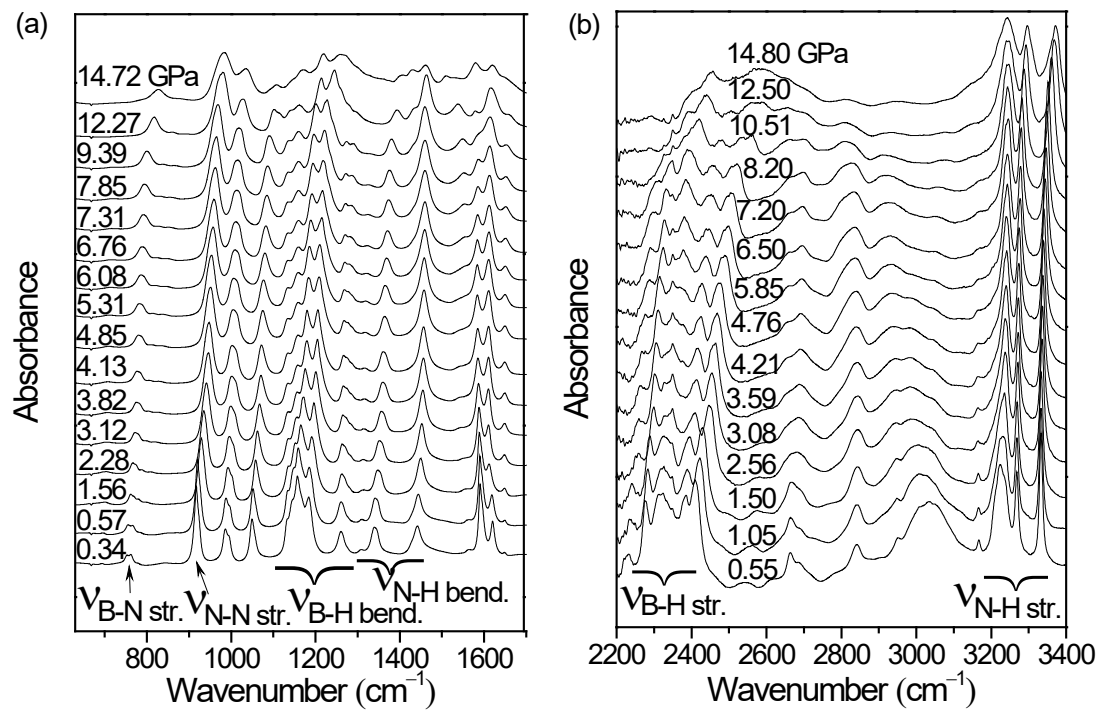

**Fig. S2.** Selected IR spectra of  $\text{N}_2\text{H}_4\text{BH}_3$  collected at room temperature on compression in the region of 630–3400  $\text{cm}^{-1}$ . The pressures in GPa are labeled for each spectrum and the assignments are labeled for selected IR modes.

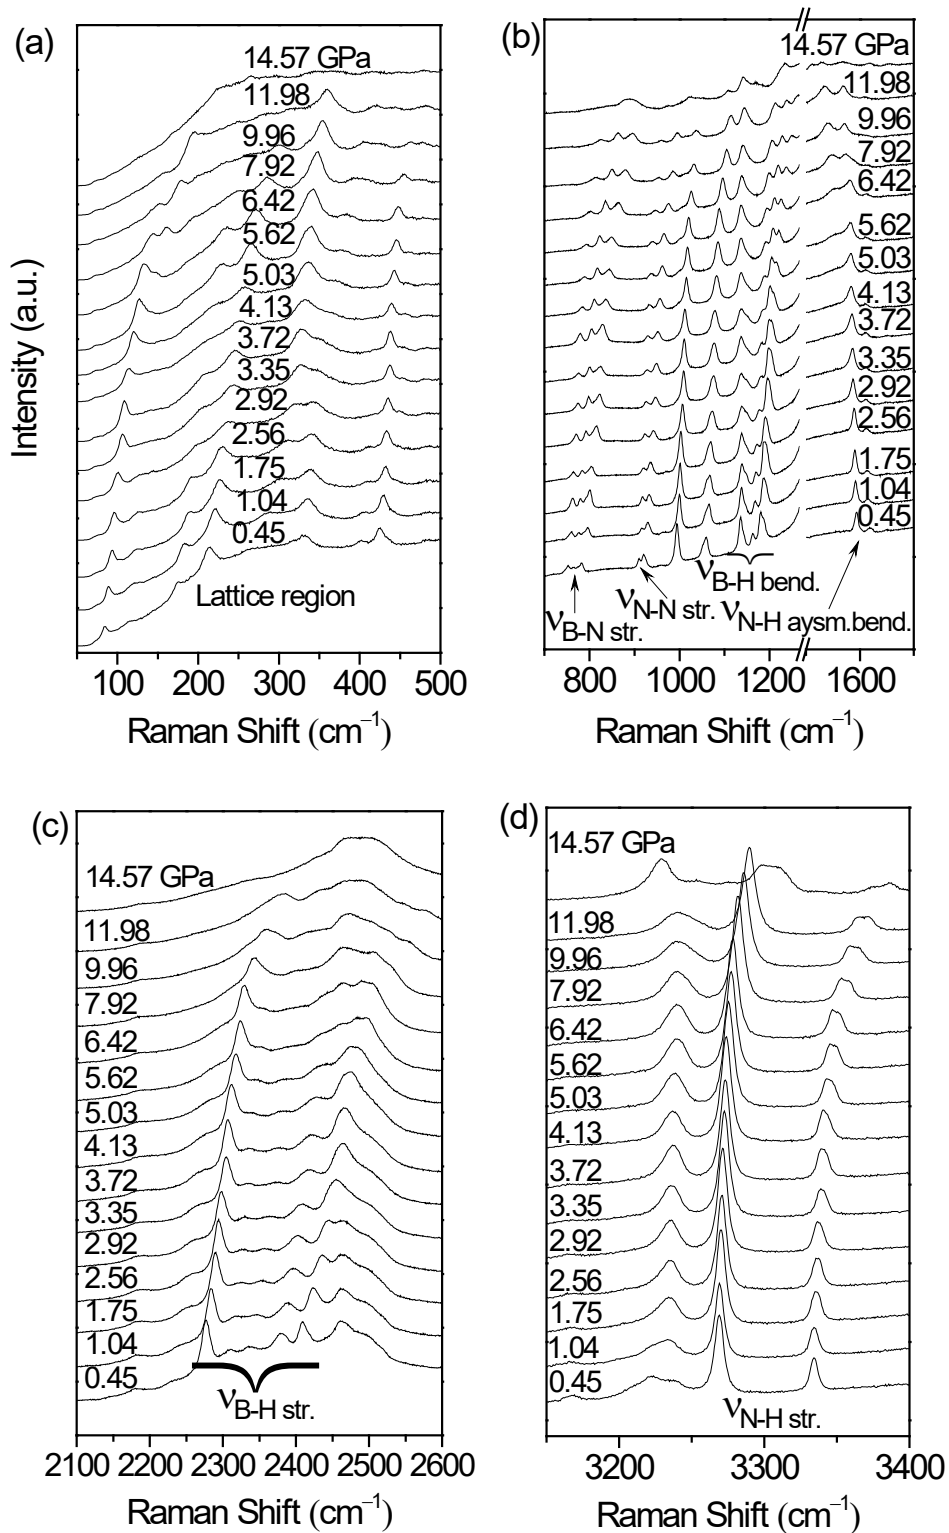

**Fig. S3.** Selected Raman spectra of  $N_2H_4BH_3$  collected at room temperature on compression in the region of 5–3400  $cm^{-1}$ . The pressures in GPa are labeled for each spectrum and the assignments are labeled for selected Raman modes.

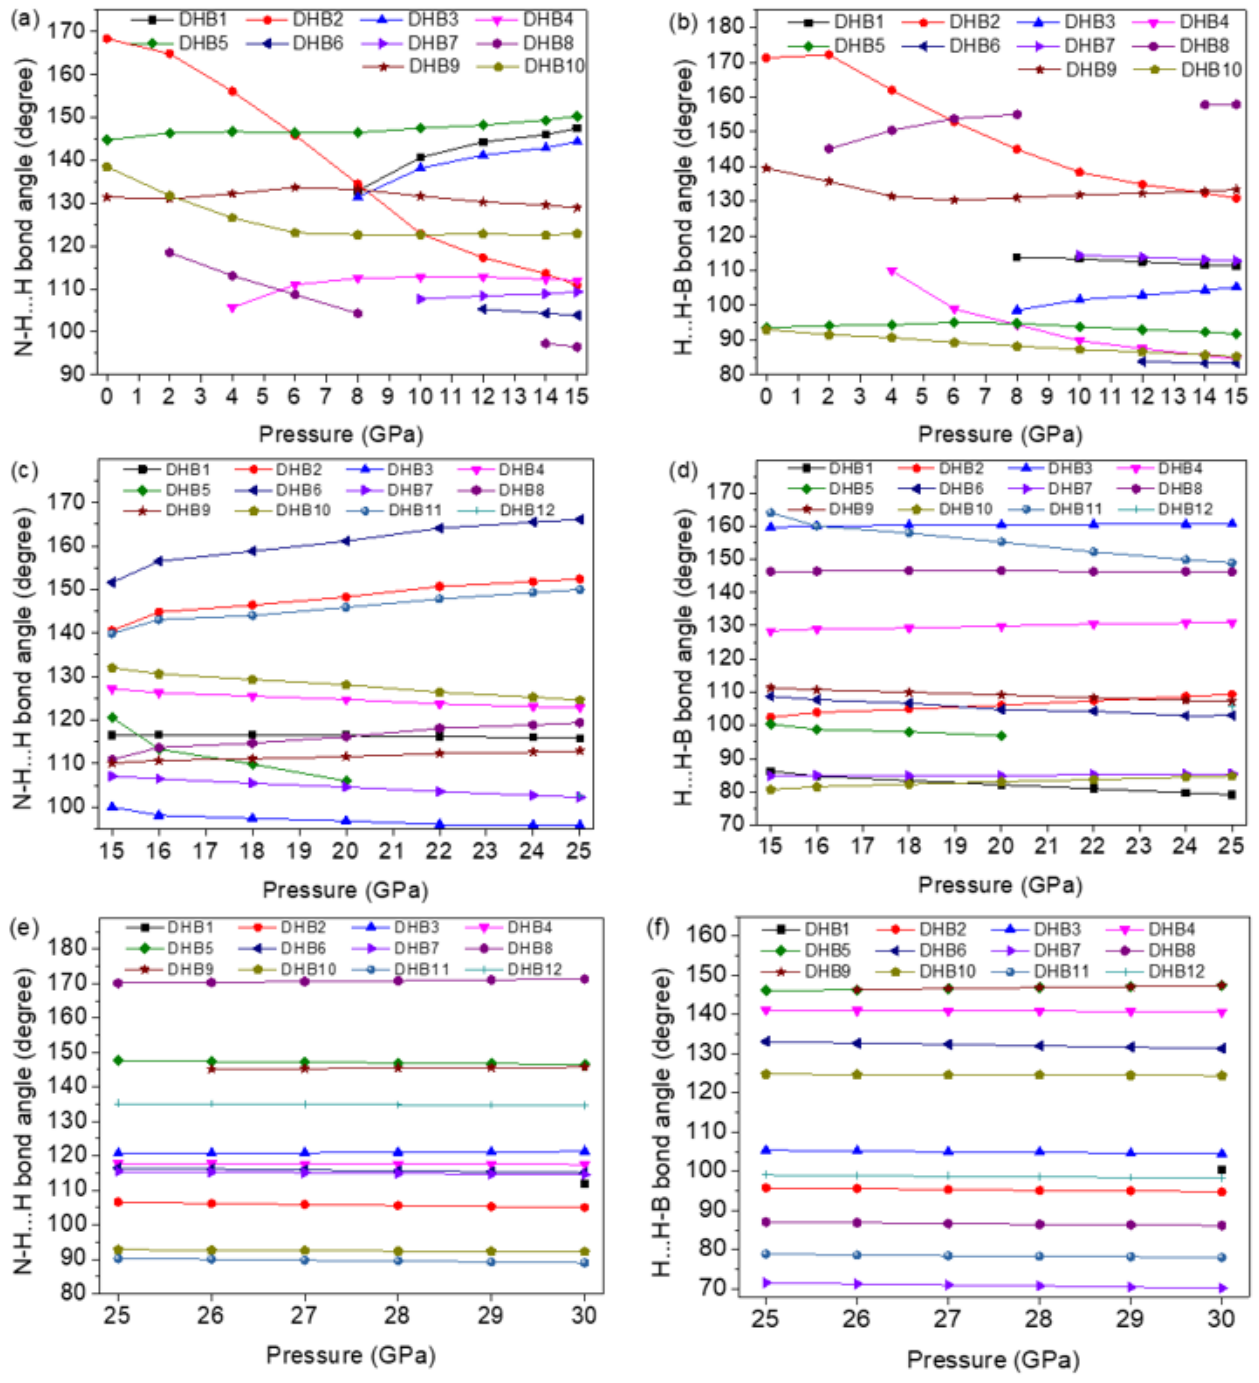

Figure S4. The N-H...H and H...H-B angles versus pressure in phase I (a) (b), phase II (c) (d), and phase III (e) (f).

**Table S1.** Assignments and vibrational frequencies ( $\text{cm}^{-1}$ ) of  $\text{N}_2\text{H}_4\text{BH}_3$  at ambient pressure.

|                        | IR ( $\text{cm}^{-1}$ ) | Raman ( $\text{cm}^{-1}$ ) |
|------------------------|-------------------------|----------------------------|
|                        |                         | 81                         |
|                        |                         | 107                        |
| Lattice modes          |                         | 156                        |
|                        |                         | 178                        |
|                        |                         | 330                        |
|                        | 749                     | 749                        |
| B–N stretching         | 755                     | 773                        |
|                        | 913                     | 907                        |
| N–N stretching         | 987                     | 992                        |
|                        | 1050                    | 1053                       |
|                        | 1155                    | 1137                       |
|                        | 1183                    | 1178                       |
| B–H bending            | 1260                    | 1269                       |
|                        | 1337                    | 1341                       |
|                        | 1436                    | 1444                       |
|                        | 1591                    | 1594                       |
| N–H asymmetric bending | 1622                    | 1623                       |
|                        | 2271                    | 2272                       |
|                        | 2300                    | 2303                       |
|                        | 2376                    | 2373                       |
| B–H stretching         | 2398                    | 2399                       |
|                        | 3168                    | 3170                       |
|                        | 3223                    | 3216                       |
|                        | 3268                    | 3269                       |
| N–H stretching         | 3333                    | 3334                       |

**Table S2.** The pressure dependence of characteristic IR modes of HB on compression.

| Assignment        | Frequency (cm <sup>-1</sup> ) | dv/dp (cm <sup>-1</sup> ·GPa <sup>-1</sup> ) |
|-------------------|-------------------------------|----------------------------------------------|
| N-N stretching    | 913                           | 4.6                                          |
| N-H rocking       | 986                           | 3.3                                          |
| B-N bending       | 1133                          | 0.4                                          |
|                   | 1156                          | 4.3                                          |
|                   | 1260                          | 1.5                                          |
| N-H bending       | 1337                          | 4.2                                          |
|                   | 1436                          | 1.3                                          |
| N-H asym. bending | 1591                          | -0.8                                         |
| B-H stretching    | 2271                          | 5.6                                          |
| N-H stretching    | 3268                          | 3.0                                          |

**Table S3.** The pressure dependence of characteristic Raman modes of HB on compression.

| Assignment     | Frequency (cm <sup>-1</sup> ) | dv/dp (cm <sup>-1</sup> ·GPa <sup>-1</sup> ) |
|----------------|-------------------------------|----------------------------------------------|
| Lattice modes  | 84                            | 6.8                                          |
|                | 288                           | 5.7                                          |
|                | 425                           | 3.7                                          |
| B-N stretching | 752                           | 6.1                                          |
|                | 783                           | 9.4                                          |
| N-N stretching | 909                           | 4.3                                          |
|                | 920                           | 6.2                                          |
| N-H rocking    | 994                           | 3.6                                          |
| B-H stretching | 2277                          | 8.7                                          |
| N-H stretching | 3269                          | 1.9                                          |



**Table S4.** Refined cell parameters and volume<sup>a</sup> of N<sub>2</sub>H<sub>4</sub>BH<sub>3</sub> at selected pressures.

| Pressure (GPa) | a (Å)  | b (Å) | c (Å) | V (Å <sup>3</sup> ) |
|----------------|--------|-------|-------|---------------------|
| 0.82           | 13.000 | 4.947 | 9.451 | 607.9               |
| 1.53           | 12.981 | 4.905 | 9.429 | 600.4               |
| 1.88           | 12.951 | 4.867 | 9.399 | 592.5               |
| 2.47           | 12.863 | 4.810 | 9.339 | 577.8               |
| 3.39           | 12.765 | 4.712 | 9.265 | 557.3               |
| 3.89           | 12.741 | 4.689 | 9.246 | 552.4               |
| 4.45           | 12.696 | 4.668 | 9.249 | 548.2               |
| 5.32           | 12.623 | 4.620 | 9.191 | 535.9               |
| 6.28           | 12.473 | 4.569 | 9.086 | 517.8               |
| 7.22           | 12.397 | 4.534 | 9.008 | 506.3               |
| 8.52           | 12.294 | 4.493 | 8.922 | 492.8               |
| 10.41          | 12.175 | 4.401 | 8.922 | 478.1               |
| 12.50          | 11.985 | 4.368 | 8.662 | 453.4               |
| 16.50          | 11.798 | 4.317 | 8.529 | 434.4               |
| 19.86          | 11.663 | 4.287 | 8.445 | 422.3               |

a. The uncertainties of all unit cell parameters from refinement are less than 0.003 Å and less than 0.7 Å<sup>3</sup> for unit cell volume.

**Table S5.** Crystal structures, cell parameters ( $a, b, c$  in Å;  $\alpha, \beta, \gamma$  in degrees) and Wyckoff positions for the unit cells of the phase I, phase II and phase III of  $N_2H_4BH_3$  optimized at ambient pressure.

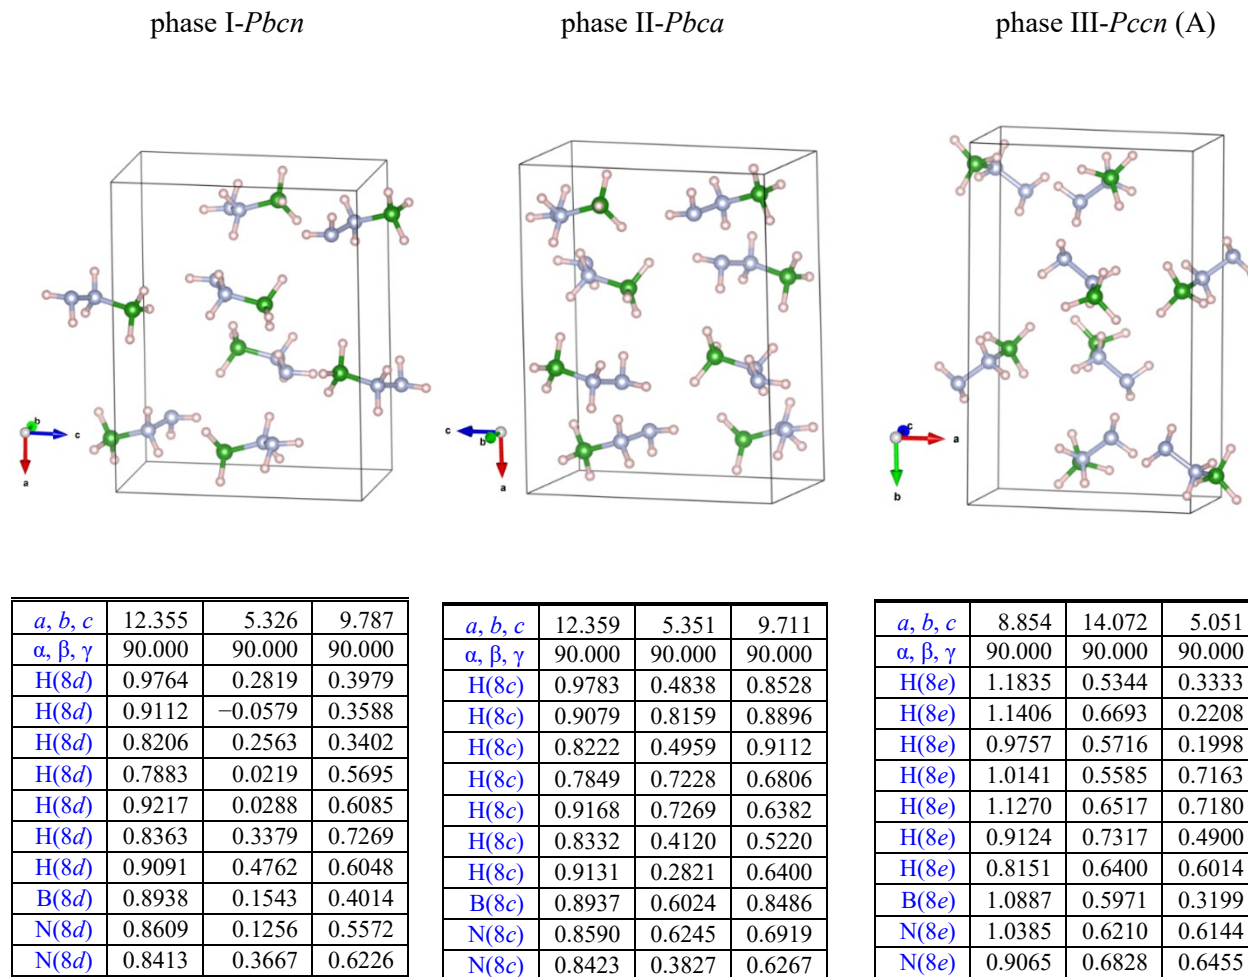

**Table S6.** Crystal structures, cell parameters ( $a, b, c$  in Å;  $\alpha, \beta, \gamma$  in degrees) and Wyckoff positions for the unit cells of the top-ranked candidate structures of  $N_2H_4BH_3$  optimized at ambient pressure.

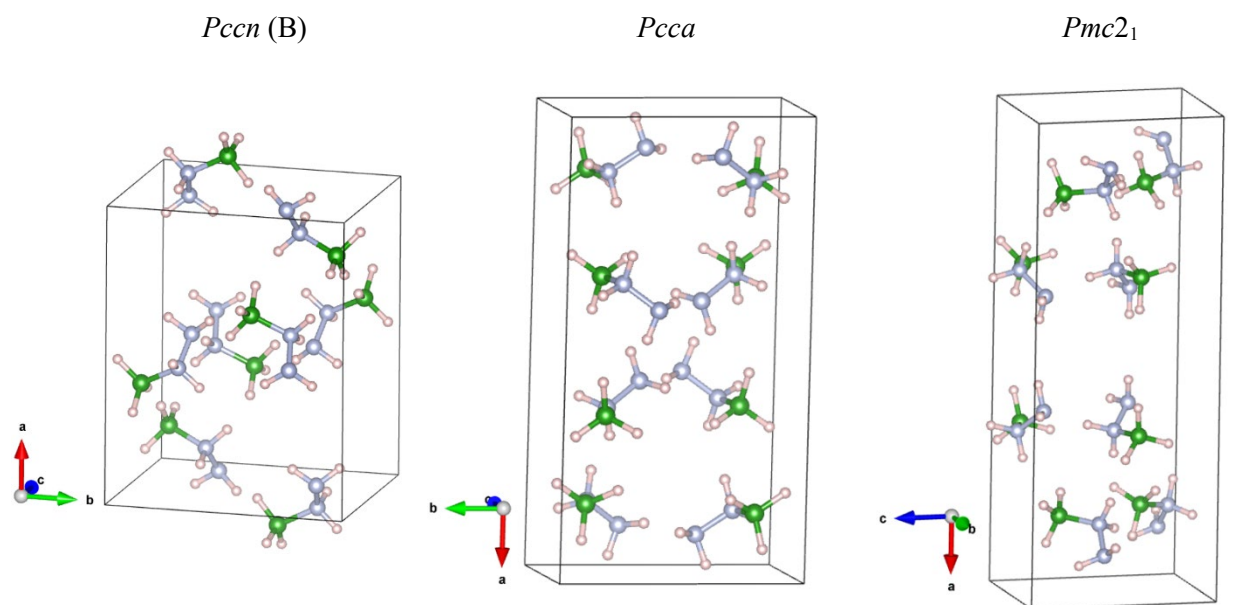

| $a, b, c$               | 11.004 | 8.820  | 7.662  |
|-------------------------|--------|--------|--------|
| $\alpha, \beta, \gamma$ | 90.000 | 90.000 | 90.000 |
| H(8e)                   | 1.2209 | 0.4374 | 0.2232 |
| H(8e)                   | 1.1779 | 0.4395 | 0.4798 |
| H(8e)                   | 1.0608 | 0.5222 | 0.3028 |
| H(8e)                   | 1.0434 | 0.2594 | 0.1793 |
| H(8e)                   | 1.1409 | 0.1818 | 0.3230 |
| H(8e)                   | 0.9322 | 0.3423 | 0.4411 |
| H(8e)                   | 0.9267 | 0.1568 | 0.3891 |
| B(8e)                   | 1.1402 | 0.4289 | 0.3313 |
| N(8e)                   | 1.0775 | 0.2679 | 0.3078 |
| N(8e)                   | 0.9817 | 0.2428 | 0.4363 |

| $a, b, c$               | 15.408 | 8.213  | 5.187  |
|-------------------------|--------|--------|--------|
| $\alpha, \beta, \gamma$ | 90.000 | 90.000 | 90.000 |
| H(8f)                   | 0.9288 | 0.1663 | 0.0642 |
| H(8f)                   | 0.8216 | 0.3054 | 0.0302 |
| H(8f)                   | 0.8105 | 0.0688 | 0.1269 |
| H(8f)                   | 0.7978 | 0.2619 | 0.5082 |
| H(8f)                   | 0.8805 | 0.1397 | 0.5491 |
| H(8f)                   | 0.9775 | 0.3356 | 0.4796 |
| H(8f)                   | 0.9047 | 0.4613 | 0.3551 |
| B(8f)                   | 0.8549 | 0.1901 | 0.1422 |
| N(8f)                   | 0.8598 | 0.2375 | 0.4386 |
| N(8f)                   | 0.9146 | 0.3777 | 0.5035 |

| $a, b, c$               | 18.602 | 5.764  | 7.209  |
|-------------------------|--------|--------|--------|
| $\alpha, \beta, \gamma$ | 90.000 | 90.000 | 90.000 |
| H(4c)                   | 0.2055 | 0.4693 | 0.7313 |
| H(4c)                   | 0.1089 | 0.5706 | 0.8281 |
| H(4c)                   | 0.1982 | 0.7581 | 0.8877 |
| H(4c)                   | 0.2045 | 0.8554 | 0.5486 |
| H(4c)                   | 0.1404 | 0.6722 | 0.4837 |
| H(4c)                   | 0.1258 | 1.1208 | 0.5776 |
| H(4c)                   | 0.0825 | 0.9630 | 0.7374 |
| H(4c)                   | 0.7050 | 0.0770 | 0.9857 |
| H(4c)                   | 0.6813 | 0.1900 | 0.7286 |
| H(4c)                   | 0.6017 | 0.1201 | 0.9122 |
| H(4c)                   | 0.6521 | 0.4497 | 1.1076 |
| H(4c)                   | 0.7166 | 0.5184 | 0.9497 |
| H(4c)                   | 0.5676 | 0.5283 | 0.8736 |
| H(4c)                   | 0.6188 | 0.7634 | 0.9144 |
| B(4c)                   | 0.1681 | 0.6347 | 0.7741 |
| B(4c)                   | 0.6635 | 0.1894 | 0.8900 |
| N(4c)                   | 0.1559 | 0.7823 | 0.5906 |
| N(4c)                   | 0.1011 | 0.9637 | 0.6026 |
| N(4c)                   | 0.6657 | 0.4480 | 0.9654 |
| N(4c)                   | 0.6183 | 0.5978 | 0.8582 |
